# Supplementary material for: High gas barrier imparted by similarly charged multilayers in nanobrick wall thin films
Source: Royal Society of Chemistry journal article supplement (doi:10.1039/c4ra01621a), 2014-01-01
Supplement: c4ra01621a1.pdf [file c4ra01621a1.pdf]

## Supplementary Information for “High Gas Barrier Imparted by Similarly Charged Multilayers in Nanobrick Wall Thin Films”

David A. Hagen, Chadley Box, Stephen Greenlee, Fangming Xiang, Oren Regev, Jaime C. Grunlan

Table S1. Thickness, oxygen transmission rate, and film permeability for PEI/MMT BL and PEI/MMT/PAA TL systems.

| Cycles | Film Thickness (nm) |      | OTR (cm <sup>3</sup> /m <sup>2</sup> ·day) |       | Film Permeability <sup>a</sup> (cm <sup>3</sup> ·cm/cm <sup>2</sup> ·s·Pa) |                          |
|--------|---------------------|------|--------------------------------------------|-------|----------------------------------------------------------------------------|--------------------------|
|        | TL                  | BL   | TL                                         | BL    | TL                                                                         | BL                       |
| 5      | 25.3                | 13.8 | 3.271                                      | 7.316 | 3.08 x 10 <sup>-19</sup>                                                   | 1.68 x 10 <sup>-18</sup> |
| 10     | 56.3                | 44.5 | 0.034                                      | 0.843 | 4.39 x 10 <sup>-21</sup>                                                   | 9.52 x 10 <sup>-20</sup> |
| 15     | 73.2                | 61.9 | 0.008                                      | 0.175 | 1.34 x 10 <sup>-21</sup>                                                   | 2.53 x 10 <sup>-20</sup> |
| 20     | 105.8               | 77.4 | 0.005                                      | 0.037 | 1.21 x 10 <sup>-21</sup>                                                   | 6.57 x 10 <sup>-21</sup> |

<sup>a</sup> Film permeability was decoupled from the total permeability using a previously described method.<sup>1</sup>

QCM data in Figure S1 was used to calculate clay concentration in the film. The mass deposited for deposition cycles 10 – 20 was used to calculate weight percent clay.

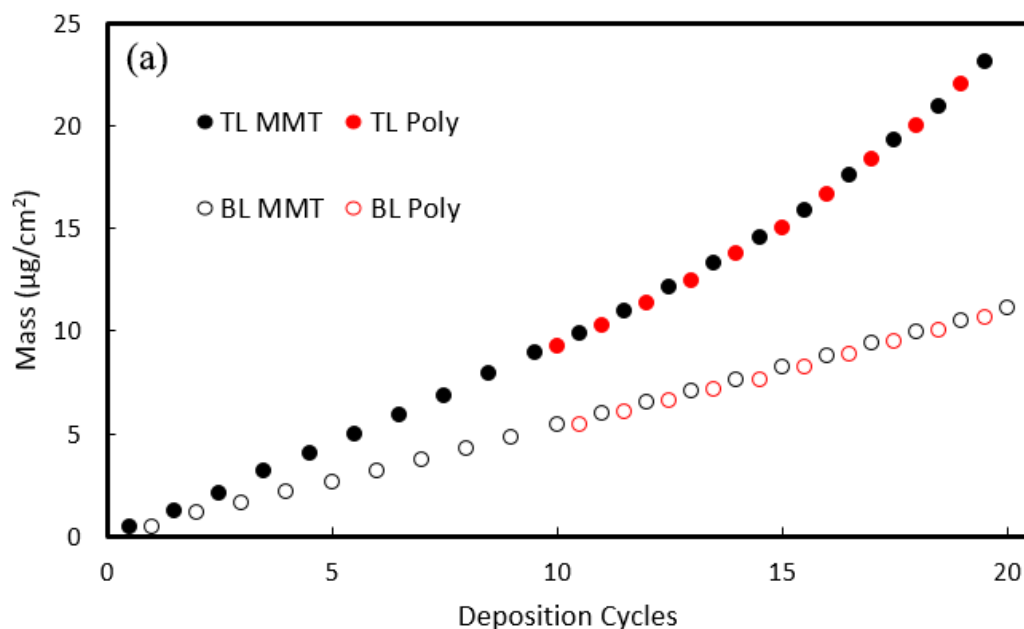

Fig. S1. (a) Thin film mass after polymer and MMT depositions for the bilayer (PEI/MMT) and trilayer (PEI/MMT/PAA) systems and (b) the same systems using high molecular weight PEI.

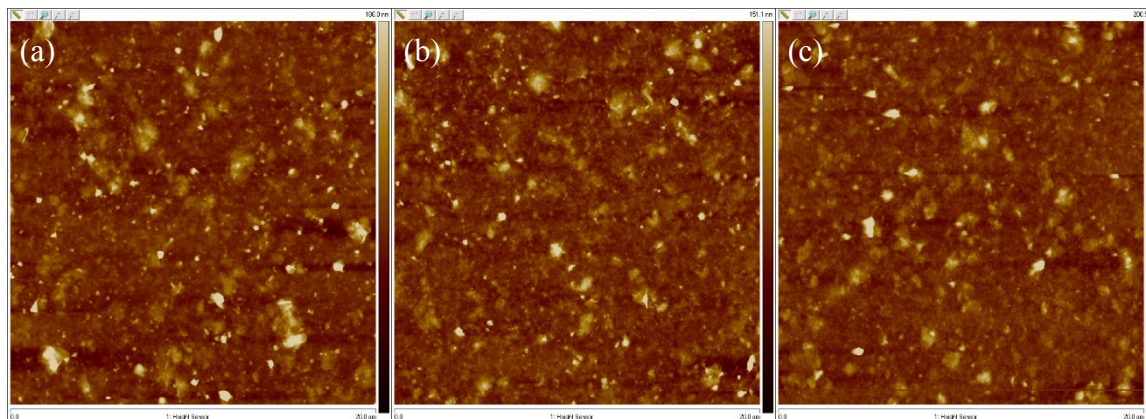

Fig. S2. Atomic force microscope (AFM) topography images of (a) 10 bilayers of PEI/MMT, (b) 10 trilayers of PEI/MMT/PAA without the final PAA layer, and (c) 10 TL of PEI/MMT/PAA.

## Reference

1. Nielsen, L. E. Models for the Permeability of Filled Polymer Systems. *Journal of Macromolecular Science: Part A - Chemistry* **1967**, *1* (5), 929-942.
